1           **Genomic selection strategies for clonally propagated**  
2 **crops**

3           Christian R. Werner\*, R. Chris Gaynor\*, Daniel J. Sargent†, Alessandra Lillo‡,  
4 Gregor Gorjanc\*, John M. Hickey\*

5

6           \*The Roslin Institute and Royal (Dick) School of Veterinary Studies, University  
7 of Edinburgh, Easter Bush Research Centre, Midlothian EH25 9RG, UK

8           †NIAB EMR, New Road, East Malling, Kent ME19 6BJ, UK

9           ‡Driscoll's Genetics Ltd, East Mallig Enterprise Centre, New Road, East  
10 Malling, Kent ME19 6BJ, UK

11

12           Corresponding author: Christian R Werner. [Christian.werner@roslin.ed.ac.uk](mailto:Christian.werner@roslin.ed.ac.uk)

13

14           **Key message:** For genomic selection in clonal breeding programs to be  
15 effective, crossing parents should be selected based on genomic predicted cross  
16 performance unless dominance is negligible. Genomic prediction of cross performance  
17 enables a balanced exploitation of the additive and dominance value simultaneously. A  
18 two-part breeding program with parent selection based on genomic predicted cross  
19 performance to rapidly drive population improvement has great potential to improve  
20 breeding clonally propagated crops.

21           **Abstract**

22           For genomic selection in clonal breeding programs to be effective, crossing  
23 parents should be selected based on genomic predicted cross performance unless  
24 dominance is negligible. Genomic prediction of cross performance enables a balanced  
25 exploitation of the additive and dominance value simultaneously. Here, we compared  
26 different strategies for the implementation of genomic selection in clonal plant breeding  
27 programs. We used stochastic simulations to evaluate six combinations of three  
28 breeding programs and two parent selection methods. The three breeding programs  
29 included i) a breeding program that introduced genomic selection in the first clonal  
30 testing stage, and ii) two variations of a two-part breeding program with one and three  
31 crossing cycles per year, respectively. The two parent selection methods were i)  
32 selection of parents based on genomic estimated breeding values, and ii) selection of  
33 parents based on genomic predicted cross performance. Selection of parents based on  
34 genomic predicted cross performance produced faster genetic gain than selection of  
35 parents based on genomic estimated breeding values because it substantially reduced  
36 inbreeding when the dominance degree increased. The two-part breeding programs  
37 with one and three crossing cycles per year using genomic prediction of cross  
38 performance always produced the most genetic gain unless dominance was negligible.  
39 We conclude that i) in clonal breeding programs with genomic selection, parents should  
40 be selected based on genomic predicted cross performance, and ii) a two-part breeding  
41 program with parent selection based on genomic predicted cross performance to rapidly  
42 drive population improvement has great potential to improve breeding clonally  
43 propagated crops.

## 44            **Introduction**

45            In this paper we show that, for genomic selection in clonal breeding programs  
46 to be effective, crossing parents should be selected based on genomic predicted cross  
47 performance, unless dominance is negligible. In most plant and animal breeding  
48 programs which apply genomic selection, new parents are selected based on their  
49 genomic estimated breeding value (e.g. Meuwissen et al., 2016; Crossa et al., 2017).  
50 The genomic estimated breeding value (commonly referred to as GEBV) is by  
51 definition the sum of the average effects predicted for all marker alleles of a genotype,  
52 while dominance deviation, which cannot be directly passed on to the progeny, is not  
53 considered (Goddard, 2009; Su et al., 2012). Selection based on the genomic estimated  
54 breeding value aids breeders in increasing the frequency of alleles with beneficial  
55 additive genetic effects in a given breeding population. As a result, heterozygosity is  
56 reduced. Although selection for the genomic estimated breeding value will increase the  
57 additive value over time, it may lead to a reduction of the dominance value, unless  
58 dominance is negligible. In the long term, using the genomic estimated breeding value  
59 to select new parents in breeding programs which deliver outbred varieties, such as in  
60 clonal plant breeding programs, might not be the optimal method to use in order to  
61 maximize the total genetic value of the breeding population in a sustainable fashion.

62            Many major food crops, including nearly all types of fruit and all important  
63 roots and tubers, are clonally propagated (Grüneberg et al., 2009; Bradshaw, 2016). In  
64 clonal breeding programs, new genotypes are created by sexual reproduction and  
65 multiplied through clonal propagation (Bisognin, 2011; Gemenet and Khan, 2017). The  
66 new genotypes are first tested as seedlings in unreplicated trials during the initial phase  
67 of the breeding program. Clonal propagation creates genetically identical plants from

68 selected seedlings, which enables the testing of genotypes in clonal plots, using multiple  
69 replications, environments and years.

70 Breeders use multiple stages of testing to identify and select the best genotypes  
71 in their breeding population. As the testing progresses, the number of genotypes is  
72 successively reduced and those remaining are tested more intensively at increasingly  
73 higher numbers. The selected genotypes are used to achieve two specific objectives:

74 i) Generation of an improved offspring population via recombination of  
75 selected parents.

76 ii) Release of the best performing genotypes as improved clonal varieties.

77 The time from recombination to the release of an improved clonal variety spans  
78 several years. Traditionally, selection is based on phenotypic performance and the next  
79 generation's parents are selected in the later testing stages of the breeding program,  
80 which results in a long generation interval (Bradshaw, 2016), even in species with short  
81 generational times, such as strawberry.

82 Genomic selection offers great potential to optimize the process of  
83 identification of the best clones for varietal development, as well as the selection of  
84 new crossing parents. Genomic selection exploits associations between genomic  
85 markers and phenotypes to predict the value of genotypes based on their genomic  
86 marker profiles (Goddard and Hayes, 2007). The implementation of genomic selection  
87 provides three key advantages:

88 i) The generation interval can be reduced, since new parents can be selected  
89 as soon as they are genotyped.

90 ii) The selection accuracy can be increased, especially in early testing stages

91 of a breeding program where the number of replications and  
92 environments is low.

93 iii) The selection intensity can be increased, for example by genotyping and  
94 predicting more genotypes than could be tested in the field.

95 These advantages allow for several opportunities to reorganize conventional  
96 breeding programs. For example, in the context of breeding programs to develop inbred  
97 lines, Gaynor et al. (2017) presented a two-part breeding program employing genomic  
98 selection, which reorganized a plant breeding program into:

- 99 i) A population improvement component to develop improved germplasm  
100 through rapid recurrent genomic selection, and  
101 ii) A product development component to identify the best performing  
102 genotypes for varietal development.

103 In stochastic simulation, the two-part breeding program doubled the rate of  
104 genetic gain relative to a conventional breeding program without increasing cost.

105 In a clonal breeding program, the reorganization in two parts combined with  
106 genomic selection would allow breeders to minimize the generation interval and could  
107 substantially increase selection accuracy at the seedling stage.

108 The generation interval could be reduced to a year or even less since new parents  
109 can be selected as soon as the seedlings are genotyped. For example, the generation  
110 interval in conventional strawberry breeding programs can be four to five years due to  
111 the time it takes for testing to generate sufficient phenotypic records to accurately assess  
112 a genotype. Genomic selection applied in the seedling stage could result in up to five  
113 times the genetic gain achieved in a conventional strawberry breeding program in the

114 same amount of time if the impact of the three other factors in the breeder's equation  
115 (i.e., selection intensity, diversity and selection accuracy) remained constant.

116 The selection accuracy in the seedling stage could be increased since genomic  
117 selection allows seedlings to be selected based on their predicted performance as clones  
118 instead of their phenotypic performance *per se*. This is achieved when the genomic  
119 selection model to select seedlings is trained using clonal phenotypes. In clonal  
120 breeding programs, the seedling stage represents a severe genetic bottleneck; in  
121 conventional strawberry breeding programs only a few hundred genotypes among  
122 10,000 – 20,000 unreplicated seedlings are selected and tested as clones. Selection  
123 accuracy is extremely low at the seedling test stage for three reasons (Grüneberg et al.,  
124 2009), which are:

- 125 i) Seedlings and clones with the same genotype can differ in their morphology  
126 and performance.
- 127 ii) Seedlings and clones are often grown in different environments. For example,  
128 in European strawberry breeding programs, seedlings are grown in matted  
129 rows on the soil and clones are grown as single pot plants on highly controlled  
130 table top systems.
- 131 iii) Single plant assessment of mostly general appearance and/or a few key traits  
132 in the seedling stage shows low heritability and has low correlation with the  
133 breeding goal trait (e.g., yield).

134 Replacing phenotypic selection in the seedling stage with genomic selection  
135 based on the predicted performance as clones eliminates all three challenges in one step.  
136 It also allows for early evaluation of important traits that are typically not evaluated  
137 until later testing stages of the breeding program, e.g. flavour and shelf life.

138           In clonally propagated crops, however, dominance may affect the performance  
139 of breeding programs which implement genomic selection. The genotypes in clonally  
140 propagated crops are typically heterozygous. The genetic value of heterozygous  
141 genotypes is a function of additive and non-additive gene action (Falconer and Mackay,  
142 1996). If, for the sake of simplicity, epistasis is ignored, the non-additive gene action is  
143 entirely defined by dominance. Whilst the differences in the genetic values between  
144 genotypes are based on both additive and non-additive genetic effects, the additive  
145 genetic variation is the crucial component which defines long-term genetic gain in a  
146 breeding population subjected to recurrent selection (Bradshaw 2016). Hence, breeders  
147 face the challenging task of having to increase the additive value over time while  
148 simultaneously maintaining the dominance value via selection and recombination of  
149 the best parents. The relative importance of these two targets is a function of the  
150 dominance degree at the loci affecting the trait under consideration, which is mostly  
151 unknown.

152           We hypothesise that genomic prediction of cross performance is a better method  
153 to select new parents in a clonal breeding program than using the genomic estimated  
154 breeding value. When genomic prediction of cross performance is used, pairs of parents  
155 are selected based on the expectation of the total genetic value of their progeny.  
156 Genomic prediction of cross performance could allow breeders to simultaneously  
157 increase the frequency of alleles with beneficial additive effects and maintain  
158 heterozygosity in the population to exploit dominance effects. In the long term, using  
159 genomic prediction of cross performance to select new parents in a clonal breeding  
160 program could be an effective method to sustainably maximize the total genetic value  
161 of the breeding population.

162 To test our hypothesis, we used stochastic simulation to evaluate three breeding  
163 programs and two parent selection methods to deploy genomic selection in breeding  
164 clonally propagated crops under different dominance degrees. The three breeding  
165 programs included:

- 166 i) A breeding program that introduced genomic selection in the first clonal  
167 testing stage, and
- 168 ii) Two variations of a two-part breeding program (Gaynor et al., 2017) with  
169 one and three crossing cycles per year, respectively.

170 The two parent parental selection methods were:

- 171 i) Selection of parents based on genomic estimated breeding values, and
- 172 ii) Selection of parents based on genomic predicted cross performance.

173 The six combinations of breeding program and parent selection method were  
174 compared to a conventional breeding program using phenotypic selection.

175 We observed that the breeding programs using selection of parents based on  
176 genomic predicted cross performance produced faster genetic gain than parent selection  
177 based on genomic estimated breeding values unless dominance was negligible. The  
178 highest rates of genetic gain were generated by the two-part breeding programs with  
179 parent selection based on genomic predicted cross performance.

180

181

182



## 183 **Materials and methods**

184 Stochastic simulations were used to evaluate six combinations of three breeding  
185 programs and two parent selection methods to deploy genomic selection in breeding  
186 clonally propagated crops with diploid (-like) meiotic behaviour. Therefore, we  
187 simulated a quantitative trait representing yield under four different dominance degrees  
188 and evaluated the long-term efficacy of the six combinations of breeding programs and  
189 parent selection methods compared to a conventional breeding program using  
190 phenotypic selection.

191 The material and methods are subdivided into two sections. The first section  
192 describes the simulation of the founder genotype population and the second section  
193 describes the simulation of the breeding programs.

194 The simulation of the founder genotype population comprised:

- 195 i) Genome simulation: a heterozygous genome sequence was simulated for a  
196 hypothetical diploid and clonally propagated crop species.
- 197 ii) Simulation of founder genotypes: the simulated genome sequences were  
198 used to generate a base population of 60 diploid founder genotypes.
- 199 iii) Simulation of genetic values: A single trait representing yield was  
200 simulated for all founder genotypes by summing the additive and  
201 dominance effects at 20,000 quantitative trait nucleotides. Four different  
202 dominance degrees were simulated including 0, 0.1, 0.3 and 0.9
- 203 iv) Simulation of phenotypes: Phenotypes for yield were simulated for all  
204 founder genotypes by adding random error to the total genetic value of  
205 a genotype.

206 The simulation of the breeding programs comprised:

207 i) Recent (burn-in) breeding phase: a conventional phenotypic selection  
208 breeding program for clonally propagated crops was simulated for a  
209 period of 20 years (burn-in) to provide a common starting point for the  
210 future breeding phase.

211 ii) Future breeding phase: six combinations of three breeding programs and  
212 two parent selection methods to deploy genomic selection in clonally  
213 propagated crops were simulated and compared to the conventional  
214 breeding program for 20 years of breeding. In detail, we describe:

215 a. The genomic selection model used for genomic prediction.

216 b. The two parent selection methods including parent selection based on  
217 genomic estimated breeding values and parent selection based on  
218 genomic predicted cross performance.

219 c. The three breeding programs with genomic selection including a  
220 breeding program which implemented genomic selection in the clonal  
221 testing stage 1, and two variations of a two-part breeding program  
222 which implemented genomic selection in the seedling stage with one  
223 and three crossing cycles per year, respectively.

224 d. Comparison of the breeding programs based on the mean total genetic  
225 value in clonal testing stage 1.

226

227

228

## 229 **Simulation of the founder genotype population**

### 230 *Genome simulation*

231 A heterozygous genome sequence was simulated for each genotype of a  
232 hypothetical diploid and clonally propagated crop species. The simulated genome  
233 consisted of 20 chromosome pairs with a physical length of  $10^8$  base pairs and a genetic  
234 length of 100 centiMorgans (cM), resulting in a total genetic length of 2,000 cM  
235 comparable to that of the *Fragaria* × *ananassa* genome (Sargent et al., 2009, 2016; van  
236 Dijk et al., 2014; Bassil et al., 2015). The chromosome sequences were generated using  
237 the Markovian coalescent simulator (MaCS; Chen et al. 2009), which was deployed  
238 using AlphaSimR version 0.11.0 (Gaynor et al., 2019). Recombination rate was derived  
239 as ratio between genetic length and physical genome length (i.e., 100 cM /  $10^8$  base  
240 pairs =  $10^{-8}$ ). The per-site mutation rate was set to  $2.5 \times 10^{-8}$  mutations per base pair.  
241 Effective population size ( $N_e$ ) was set to 100 and resulted from a simulated coalescence  
242 process with an effective population size of 500, 1,250, 1,500, 3,500, 6,000, 12,000 and  
243 100,000 set for 100, 500, 1,000, 5,000, 10,000, and 100,000 generations ago.  
244 Successive reduction of the effective population size was used to reflect a progressive  
245 restriction of genetic variation due natural and artificial selection.

246

### 247 *Simulation of founder genotypes*

248 The simulated genome sequences were used to generate a base population of 60  
249 diploid founder genotypes in Hardy-Weinberg equilibrium. These genotypes were  
250 formed by randomly sampling 20 chromosome pairs per genotype and served as initial  
251 parents in the burn-in phase. A set of 1,000 biallelic quantitative trait nucleotides

252 (QTN) and 1,000 single nucleotide polymorphisms (SNP) were randomly sampled  
253 along each chromosome to simulate a quantitative trait that was controlled by 20,000  
254 QTN and a SNP marker array with 20,000 markers.

255

### 256 *Simulation of genetic values*

257 Genetic values for a single trait representing yield were simulated by summing  
258 the genetic effects at the 20,000 randomly sampled QTN. Three types of biological  
259 effects were modelled at each QTN to simulate genetic values: additive effects,  
260 dominance effects and genotype-by-environment effects. Under the AlphaSimR  
261 framework, this is referred to as an ADG trait. We will give only a brief summary of  
262 the modelling procedure, while a detailed description can be found in the vignette of  
263 the AlphaSimR package (Gaynor et al., 2019).

264 Additive effects ( $a$ ) were sampled from a standard normal distribution and  
265 scaled to obtain an additive variance of  $\sigma_A^2 = 1$  in the founder population. Genotype-  
266 by-environment effects were modelled using an environmental covariate and a  
267 genotype-specific slope. The environmental covariate represented the environmental  
268 component of the genotype-by-environment interaction and was sampled for each year  
269 of the simulation from a standard normal distribution. The genotype-specific slope  
270 represented the genetic component of the genotype-by-environment interaction. The  
271 effects for the genotype specific slope were sampled from a standard normal  
272 distribution and scaled to obtain a genotype-by-environment interaction variance of  
273  $\sigma_{G \times Y}^2 = 2\sigma_A^2 = 2$  in the founder population.

274 Dominance effects ( $d$ ) for all QTN were calculated by multiplying the absolute  
275 value of its additive effect  $a_i$  by a locus-specific dominance degree  $\delta_i$ . A dominance  
276 degree of 0 represents no dominance and a dominance degree of 1 represents complete  
277 dominance. Dominance degrees between 0 and 1 correspond to partial dominance, and  
278 values above 1 correspond to over-dominance. Dominance degrees were sampled from  
279 a normal distribution with mean dominance coefficient  $\mu_\delta$  and variance  $\sigma_\delta^2$ :

$$280 \quad \delta_i \sim N(\mu_\delta, \sigma_\delta^2)$$

281 The dominance effect of QTN  $i$  was calculated as:

$$282 \quad d_i = \begin{cases} 0 & \text{if QTN is homozygous} \\ \delta_i * |a_i| & \text{if QTN is heterozygous} \end{cases}$$

283 Three levels of average dominance degrees, 0.1, 0.3 and 0.9, were used to  
284 simulate positive directional dominance and compared to zero dominance (i.e., additive  
285 genetic control). The variance  $\sigma_\delta^2$  was set to 0.2. The dominance variance ( $\sigma_D^2$ ) was then  
286 calculated based on the simulated dominance effects.

287

### 288 *Simulation of phenotypes*

289 Phenotypes for yield were generated by adding random error to the genetic  
290 value of a genotype. The random error was sampled from a normal distribution with  
291 mean zero and an error variance  $\sigma_e^2$  defined by the target level of heritability at each  
292 testing stage of the breeding program. In the founder population, entry-mean values for  
293 narrow-sense heritability ( $h^2$ ) were set to 0.1 in the seedling stage and to 0.3 in clonal  
294 testing stage 1 of the breeding program, with  $\sigma_{G \times Y}^2$  set to 0. Entry-mean levels for

295 narrow-sense heritabilities in later testing stages increased as a result of an increased  
296 number of replicates per genotype and are shown in Table 1. Narrow-sense heritabilities  
297 were calculated using the following equation:

$$298 \quad h^2 = \frac{\sigma_A^2}{\sigma_P^2} = \frac{\sigma_A^2}{\sigma_A^2 + \sigma_D^2 + \sigma_e^2/n}$$

299

## 300 **Simulation of the breeding programs**

### 301 *Recent (burn-in) breeding phase*

302 A conventional breeding program for clonally propagated crops employing  
303 phenotypic selection was simulated for a period of 20 years (burn-in) to provide a  
304 common starting point for the future breeding phase. Each year of the conventional  
305 breeding program started with a crossing block of 60 parental genotypes. These  
306 genotypes were crossed to generate new seedlings, followed by a six year evaluation  
307 period that involved six stages of testing. Selection of new parents and selection of the  
308 best clones in each testing stage were based on phenotypic records. The structure and  
309 the values for key parameters of the conventional breeding program were guided by a  
310 commercial strawberry breeding program in the United Kingdom. Table 1 presents the  
311 number of tested genotypes and replications for each testing stage of the conventional  
312 breeding program as shown in Figure. 1.

313 In order to fill the breeding pipeline and generate a starting point for the burn-  
314 in phase, six cycles of crossing and selection were conducted prior to the burn-in phase.  
315 Each of these six cycles started with the same 60 founder genotypes to generate 150 F<sub>1</sub>-

316 families with 100 seedlings each, using random sampling of bi-parental crosses without  
317 replacement. Starting from the set of 15,000 seedlings after the first crossing cycle, the  
318 best genotypes were advanced one stage per cycle using phenotypic selection until each  
319 testing stage was filled with a set of genotypes. Replacement of parents was omitted  
320 during the filling of the breeding pipeline. This was done to ensure that total genetic  
321 variance in the founder genotypes remained unchanged until the actual burn-in phase  
322 started.

323 **Table 1** Number of tested genotypes, replications and heritabilities used in the  
324 conventional breeding program

| <b>Year</b> | <b>Stage</b>   | <b>Tested genotypes</b> | <b>Reps</b> | <b>Narrow-sense heritability (<math>h_2</math>)*</b> |
|-------------|----------------|-------------------------|-------------|------------------------------------------------------|
| <b>1</b>    | Seedlings      | 15,000                  | 1           | 0.10                                                 |
| <b>2</b>    | Clonal stage 1 | 1,000                   | 1           | 0.30                                                 |
| <b>3</b>    | Clonal stage 2 | 100                     | 2           | 0.46                                                 |
| <b>4</b>    | Clonal stage 3 | 20                      | 4           | 0.63                                                 |
| <b>5</b>    | Clonal stage 4 | 5                       | 6           | 0.72                                                 |
| <b>6</b>    | Clonal stage 5 | 5                       | 6           | 0.72                                                 |

325 \*entry-mean values based on the  $\sigma_A^2 : \sigma_P^2$  ratio in the founder population

326

327 In the burn-in phase, selection of new parents was carried out in the clonal  
328 testing stages 2, 3, 4 and 5. Each year, the 30 genotypes in the crossing block with the  
329 poorest *per se* performance were replaced by new parents. At first, all 30 genotypes in  
330 the clonal testing stages 3, 4 and 5 were added to the crossing block as new parents if

331 they were not already represented. The remaining free slots in the crossing block were  
332 filled with the best genotypes from the clonal testing stage 2.

333

### 334 *Future Breeding Phase*

335 The future breeding phase was used to evaluate six combinations of two  
336 breeding programs and two parent selection methods to deploy genomic selection in  
337 clonally propagated crops under different dominance degrees. These six combinations  
338 were simulated for an additional 20 years of breeding and compared to the conventional  
339 breeding program. The two genomic selection breeding programs included a  
340 conventional breeding program with genomic selection which introduced genomic  
341 selection in clonal testing stage 1 (Fig. 1), and two variations of a two-part breeding  
342 program which introduced genomic selection in the seedling stage with one and three  
343 crossing cycles per year, respectively (Fig. 2). The two parent selection methods were  
344 selection of new parents based on genomic estimated breeding values, and selection of  
345 new parents based on genomic predicted of cross performance. In order to obtain  
346 approximately equal annual operating costs, the number of seedlings was reduced in  
347 the two breeding programs with genomic selection to compensate for the additional  
348 costs of genotyping. Estimated costs were set to \$20 for phenotypic evaluation and \$25  
349 for array genotyping per genotype after consultation with strawberry breeders. Table 2  
350 shows the number of crosses and seedlings per year for the conventional breeding  
351 program and the three breeding programs with genomic selection.

352

353



354 **Table 2** Number of crosses per year and seedlings per cross, total number of  
355 seedlings and annual costs of the simulated breeding programs (Conv, conventional  
356 breeding program; Conv GS, conventional breeding program with genomic selection;  
357 2Part, two-part breeding program)

| <b>Breeding Program</b> | <b>Crosses /<br/>year</b> | <b>Seedlings /<br/>cross</b> | <b>Seedlings<br/>(total)</b> | <b>Costs (\$)</b> |
|-------------------------|---------------------------|------------------------------|------------------------------|-------------------|
| Conv                    | 150                       | 100                          | 15,000                       | 300,000           |
| Conv GS                 | 150                       | 91                           | 13,650                       | 298,000           |
| 2Part                   | 130                       | 84                           | 11,960                       | 299,000           |
| 2Part with 3 cycles     | 100 x 3                   | 40 x 3                       | 12,000                       | 300,000           |

358

359 *Genomic Selection Model*

360 Genomic predictions were calculated using a ridge regression model (RR-  
361 BLUP) including year as a fixed effect, additive and dominance SNP effects, and a  
362 covariate accounting for directional dominance (or inbreeding depression) based on  
363 average individual heterozygosity as described in detail by Xiang et al. (2016). The  
364 effect estimated for the covariate accounting for directional dominance was divided by  
365 the number of SNPs and added to the SNP-specific dominance effects. To obtain  
366 genomic estimated breeding values, the predicted additive and dominance SNP effects  
367 at each marker locus were used to calculate the average effect of an allele substitution  
368 for each SNP (Varona et al., 2018), and all the substitution effects were summed. To  
369 obtain genomic estimated genetic values, the predicted additive and dominance SNP  
370 effects at each marker locus were summed. The initial training population at the start

371 of the future breeding phase consisted of all the genotypes from clonal testing stage 1  
372 of the last three years of the burn-in phase. The training population included 3,000  
373 genotypes and 3,220 phenotypic records. In every year of the future breeding phase,  
374 1,000 new genotypes from clonal testing stage 1 were added to the training population.

375

#### 376 *Parent selection methods*

377 Two parent selection methods were compared for the selection and crossing of  
378 new parents in the two breeding programs with genomic selection. The first parent  
379 selection method will be referred to as *parent selection based on genomic estimated*  
380 *breeding values*. This method represented a conventional “good by good” crossing  
381 scheme. The genotypes with the highest genomic estimated breeding values were  
382 selected as new parents and used to completely replace the previous year’s crossing  
383 block. Crossing was implemented as random sampling of bi-parental combinations  
384 without replacement. The second parent selection method will be referred to as *parent*  
385 *selection based on genomic predicted cross performance*. This method implemented  
386 systematic selection of bi-parental crosses. The best bi-parental crosses were selected  
387 based on the predicted mean genetic values of the F<sub>1</sub> of a cross. In this way, the average  
388 amount of heterosis predicted for the F<sub>1</sub> due to complementarity between two parents  
389 was directly considered in the parent selection process. The mean genetic value of the  
390 F<sub>1</sub> of a cross was predicted using the following equation given by Falconer & Mackay  
391 (1996):

$$392 \quad M_{F_1} = a(p - q - y) + d[2pq + y(p - q)]$$

393 with  $M_{F_1}$  being the predicted mean genotypic value of the  $F_1$ ,  $a$  and  $d$  being the  
394 additive and dominance effects of the SNP markers,  $p$  and  $q$  being the marker allele  
395 frequencies of one parent and  $y$  representing the difference of gene frequency between  
396 the two parents. The concept of the crossing block was abandoned.

397

### 398 *Conventional breeding program with genomic selection*

399 The conventional breeding program with genomic selection introduced  
400 genomic selection in clonal testing stage 1. The structure of the conventional breeding  
401 program with genomic selection is shown in Figure 1. All 1,000 genotypes in clonal  
402 testing stage 1 were genotyped and phenotyped to serve as the training population for  
403 the genomic selection model. When parents were selected based on genomic estimated  
404 breeding values, each year the best 60 genotypes in clonal testing stage 1 were used to  
405 replace the whole crossing block. When parents were selected based on genomic  
406 predicted cross performance, bi-parental cross performance was predicted for all  
407 pairwise combinations between the genotypes in clonal testing stage 1. The generation  
408 interval was two years. Genomic selection was also used to advance the best 100 clones  
409 from clonal testing stage 1 to clonal testing stage 2 based on their genomic estimated  
410 genetic value.

411

### 412 *Two-part breeding programs*

413 The two-part breeding programs reorganized the conventional breeding  
414 program into a population improvement component to develop improved germplasm

415 through rapid recurrent genomic selection, and a product development component to  
416 identify the best performing genotypes. Two variations of the two-part breeding  
417 program with one and three crossing cycles per year respectively were simulated. The  
418 structure of the two-part breeding programs is shown in Figure 2. Genomic selection  
419 was introduced in the seedling stage. All seedlings were genotyped and phenotypic  
420 selection in the seedling stage was entirely replaced by genomic selection. All 1,000  
421 genotypes in clonal testing stage 1 were genotyped and phenotyped to serve as the  
422 training population for the genomic selection model. Thus, a key feature of the two-  
423 part breeding program is that seedlings were selected using a prediction model that was  
424 trained with phenotypic records from clones. When parents were selected based on  
425 genomic estimated breeding values, in each crossing cycle the best 60 seedlings were  
426 used to replace the whole crossing block. When parents were selected based on genomic  
427 predicted cross performance, bi-parental cross performance was predicted for all  
428 pairwise combinations between the seedlings. The generation interval was one year  
429 with one crossing cycle per year and 1/3 year with 3 crossing cycles per year. Genomic  
430 selection was also used to advance the best 1,000 seedlings to clonal testing stage 1 and  
431 the best 100 clones from clonal testing stage 1 to clonal testing stage 2 based on their  
432 genomic estimated genetic value.

433

#### 434 *Comparison of the breeding programs*

435 The performance of the three breeding programs and the two parent selection  
436 methods in comparison to the conventional breeding program was evaluated by  
437 measuring the mean total genetic value in clonal testing stage 1. Each evaluation

438 included ten simulation runs. The mean total genetic value was measured in clonal  
439 testing stage 1 for two reasons:

- 440 i) It was the earliest testing stage in which clones were evaluated.
- 441 ii) The general trends observed for genetic gain in clonal testing stage 1 were  
442 representative for genetic gain in the seedling stage and genetic gain in  
443 later testing stages of the breeding programs.

444 The additive value, the dominance value and the genomic inbreeding coefficient  
445 over time were also measured in clonal testing stage 1. The genomic inbreeding  
446 coefficient was calculated as the percentage increase of homozygosity at all quantitative  
447 trait nucleotides relative to the average homozygosity observed in the founder  
448 population.

449 All breeding programs were compared for total genetic variance, additive  
450 variance and dominance variance over time, results are shown in the supplementary  
451 material (Fig. S1-S3).

452 Prediction accuracy was assessed as the Pearson correlation coefficient in two  
453 different ways:

- 454 i) Prediction accuracy was assessed in the three breeding programs with  
455 genomic selection as the accuracy of the parent selection method  
456 including parent selection based on genomic estimated breeding values  
457 and parent selection based on genomic predicted cross performance.
- 458 ii) Prediction accuracy was assessed as the prediction accuracy of the total  
459 genetic value in the seedling stage, which was used to advance seedlings  
460 to clonal testing stage 1.

## 461           **Results**

462           The results show that for genomic selection in a clonal breeding program to be  
463 effective, crossing parents should be selected based on genomic predicted cross  
464 performance unless dominance is negligible. Selection of parents based on genomic  
465 predicted cross performance produced faster genetic gain than selection of parents  
466 based on genomic estimated breeding values when the dominance degree was greater  
467 than zero (Fig. 3). As the dominance degree increased, selection of parents using  
468 genomic prediction of cross performance also produced increasingly more genetic gain  
469 than selection based on genomic estimated breeding values. The two variations of the  
470 two-part breeding program using genomic prediction of cross performance always  
471 produced the most genetic gain unless dominance was negligible. However, while the  
472 two-part breeding program with three crossing cycles per year produced the most  
473 genetic gain when the dominance degree was low, the two-part breeding program with  
474 one crossing cycle per year produced the most genetic gain when the dominance degree  
475 was high. The breeding programs using selection of parents based on genomic  
476 estimated breeding values on the other hand, produced negative genetic gain when the  
477 dominance degree was high. Selection of parents based on genomic prediction of cross  
478 performance was advantageous over selection of parents based on genomic estimated  
479 breeding values because it substantially reduced inbreeding in the breeding population  
480 when the dominance degree increased (Fig. 4). This enabled a better exploitation of the  
481 additive value and the dominance value simultaneously, which became more important  
482 as the dominance degree increased (Fig. 5). Additionally, selection of parents based on  
483 genomic prediction of cross performance became more accurate and selection of

484 parents based on genomic estimated breeding values became less accurate at higher  
485 dominance degrees (Fig. 6).

486

### 487 **Genetic gain**

488 Selection of parents based on genomic predicted cross performance produced  
489 faster genetic gain than selection of parents based on genomic estimated breeding  
490 values unless dominance was negligible. This is shown in Figure 3, which plots genetic  
491 gain as the mean genetic value against time in clonal testing stage 1. The four panels  
492 show genetic gain under the different simulated dominance degrees for four types of  
493 breeding programs and two types of parent selection. As the dominance degree  
494 increased, selection of parents based on genomic prediction of cross performance  
495 produced increasingly more genetic gain than selection based on genomic estimated  
496 breeding values.

497 The three genomic selection breeding programs using genomic prediction of  
498 cross performance always produced more genetic gain than the conventional breeding  
499 program. The two variations of the two-part breeding program using genomic  
500 prediction of cross performance always produced the most genetic gain unless  
501 dominance was negligible (Fig. 3). However, while the two-part breeding program with  
502 three crossing cycles per year produced the most genetic gain when the dominance  
503 degree was 0.1 and 0.3, the two-part breeding program with one crossing cycle per year  
504 produced the most genetic gain when the dominance degree was 0.9. When the  
505 dominance degree was 0.1, the two-part breeding program gave 2.8 times the genetic  
506 gain of the conventional breeding program with one crossing cycle per year, and more

507 than three times the genetic gain with three crossing cycles per year. When the  
508 dominance degree was 0.9, it gave almost 7 times the genetic gain of the conventional  
509 breeding program with one crossing cycle per year, and more than five times the genetic  
510 gain with three crossing cycles per year.

511 Figure 3 also shows that the two-part breeding program with parent selection  
512 based on genomic estimated breeding values and three crossing cycles per year  
513 generated the most genetic gain when the dominance degree was zero. However, after  
514 a sharp increase in the first few years, the rate of genetic gain drastically decreased and  
515 started to approach a plateau. The two-part breeding program with parent selection  
516 based on genomic estimated breeding values and one crossing cycle per year generated  
517 the second most genetic gain. In the first few years it showed a lower rate of genetic  
518 gain than both variations of the two-part breeding program using genomic prediction  
519 of cross performance. In the long term, however, both two-part breeding programs  
520 using genomic prediction of cross performance started to plateau and were  
521 outperformed by the two-part breeding program with parent selection based on genomic  
522 estimated breeding values and one crossing cycle per year.

523 Figure 3 also shows that selection of parents based on genomic estimated  
524 breeding values produced negative genetic gain over time when the dominance degree  
525 was high. All breeding programs showed a reduced rate of genetic gain when the  
526 dominance degree increased. However, this reduction was stronger when new parents  
527 were selected based on genomic estimated breeding values. Both variations of the two-  
528 part breeding program with parent selection based on genomic estimated breeding  
529 values produced even less genetic gain than the conventional breeding program when  
530 the dominance degree was 0.3 and 0.9. These results were not surprising as selection of



531 parents based on genomic estimated breeding values gave a faster increase in the  
532 inbreeding coefficient than selection of parents based on genomic predicted cross  
533 performance when the dominance degree was high, which resulted in inbreeding  
534 depression.

535

### 536 **Genomic inbreeding coefficient**

537 Selection of parents based on genomic predicted cross performance  
538 substantially reduced inbreeding when the dominance degree increased. This is shown  
539 in Figure 4, which plots the genomic inbreeding coefficient against time in clonal  
540 testing stage 1. The four panels show the inbreeding coefficient under the different  
541 simulated dominance degrees. As the dominance degree increased, all breeding  
542 programs showed a decreased growth rate of the genomic inbreeding coefficient.  
543 However, this decrease was much stronger when parents were selected based on  
544 genomic predicted cross performance compared to when genomic estimated breeding  
545 values were used.

546 Figure 4 also shows that the two-part breeding programs with selection of  
547 parents based on genomic predicted cross performance gave the strongest reduction in  
548 the genomic inbreeding coefficient as the dominance degree increased. When the  
549 dominance degree was zero, both breeding programs had almost approached complete  
550 inbreeding at the end of the future breeding phase. However, when the dominance  
551 degree was 0.9, the two-part breeding program with parent selection based on genomic  
552 predicted cross performance and one crossing cycle per year gave the lowest inbreeding  
553 coefficient, which was negative during the entire future breeding phase. The two-part

554 breeding program with parent selection based on genomic predicted cross performance  
555 and three crossing cycles per year was also negative in the first half of the future  
556 breeding phase, but showed a slightly faster increase and became positive during the  
557 second half. By reducing the growth rate of the inbreeding coefficient when the  
558 dominance degree increased, selection of cross performance directly took the  
559 increasing importance of dominance effects to the total genetic value into account.

560

### 561 **Additive values and dominance values**

562 Selection of parents based on genomic predicted cross performance enabled a  
563 better exploitation of the combined additive and dominance values than did selection  
564 of parents based on genomic estimated breeding values. This is shown in Figure 5,  
565 which plots the additive values and the dominance values against time in clonal testing  
566 stage 1. The three upper panels (a-c) show the additive values and the three lower panels  
567 (d-f) show the dominance values.

568 The two-part breeding program with parent selection based on genomic  
569 predicted cross performance and three crossing cycles per year gave the highest  
570 increase of the additive value over time when the dominance degree was 0.1 and 0.3  
571 (Fig. 5a-c). The two-part breeding program with parent selection based on genomic  
572 estimated breeding values and three crossing cycles per year gave a lower additive  
573 value, as growth rate showed a stronger reduction over time and approached a plateau  
574 towards the end of the future breeding phase. However, when the dominance degree  
575 was 0.9, it gave the highest increase of the additive value.

576           Figure 5 a-c also shows that the rate of increase of the additive value over time  
577 was reduced as the dominance degree increased. All breeding programs gave a lower  
578 additive value under high dominance degrees compared to when the dominance degree  
579 was low. The conventional breeding program always gave the lowest increase of the  
580 additive value.

581           Selection of parents using genomic prediction of cross performance generated  
582 increased dominance values as the dominance degree increased (Fig. 5d-f). It gave a  
583 reduction of the dominance value when the dominance degree was 0.1, but a strong  
584 initial increase when the dominance degree was 0.9. The increase of the dominance  
585 value compensated for the reduced rate of increase of the additive value as the  
586 dominance degree increased. The two-part breeding program with parent selection  
587 based on genomic predicted cross performance and one crossing cycle per year gave  
588 the strongest increase. When the dominance degree was high, the two-part breeding  
589 program with one crossing cycle per year and the conventional breeding program with  
590 genomic selection maintained a relatively stable, positive dominance value over the  
591 entire future breeding phase. The two-part breeding program with three crossing cycles  
592 per year, however, showed a continuous reduction of the dominance value over time. It  
593 also showed a faster reduction than the other two breeding programs when the  
594 dominance degree was 0.1 and 0.3.

595           Selection of parents based on genomic estimated breeding values did not  
596 effectively exploit the dominance value as the dominance degree increased. This is also  
597 shown in Figure 5 d-f. Both variations of the two-part breeding program with parent  
598 selection based on genomic estimated breeding values generated reduced dominance  
599 values as the dominance degree increased. This reduction in the dominance value over

600 time became more extreme as the dominance degree increased, and was greater than  
601 the increase in the additive value over time when the dominance degree was high.

602

### 603 **Prediction accuracy of the parent selection method**

604 The advantage of using genomic predicted cross performance to select parents  
605 over using genomic estimated breeding values was not only due to a better simultaneous  
606 exploitation of the additive value and the dominance value, but also resulted from a  
607 substantially higher prediction accuracy when the dominance degree was high. At  
608 higher dominance degrees, selection of parents based on genomic predicted cross  
609 performance became more accurate and selection of parents based on genomic  
610 estimated breeding values became less accurate. This is shown in Figure 6, which plots  
611 the prediction accuracy of the parent selection methods against time. The two panels  
612 show prediction accuracy under the dominance degrees of 0.1 and 0.9 for the three  
613 types of genomic selection breeding programs and two types of parent selection  
614 method. Prediction accuracy of the parent selection method was measured in the  
615 seedling stage for the two-part breeding programs and in clonal testing stage 1 for the  
616 conventional breeding program with genomic selection. Prediction accuracy of  
617 genomic predicted cross performance became more similar in the three genomic  
618 selection breeding programs when the dominance degree increased.

619

### 620 **Prediction accuracy of the genetic value in the seedling stage**

621 Prediction accuracy of the genetic value of the seedlings increased when the  
622 dominance degree was increased. Figure 7 plots the prediction accuracy of the genetic  
623 value in the seedling stage over time. The two panels show prediction accuracy under  
624 the dominance degrees of 0.1 and 0.9. The two-part breeding program with parent  
625 selection based on genomic estimated breeding values and one crossing cycle per year  
626 always showed the highest prediction accuracy. Prediction accuracy was lower when  
627 parents were selected based on genomic predicted cross performance compared to  
628 genomic estimated breeding values. It also was lower when three crossing cycles per  
629 year were used compared to one crossing cycle. The difference in prediction accuracy  
630 due to the number of crossing cycles per year, however, became smaller as the  
631 dominance degree increased. The conventional breeding program with genomic  
632 selection using genomic predicted cross performance to select parents showed the  
633 lowest prediction accuracies under all dominance degrees.

634

## 635 Discussion

636 For genomic selection in clonal breeding programs to be effective, crossing  
637 parents should be selected based on genomic predicted cross performance unless  
638 dominance is negligible. To discuss this result, we first describe how genomic selection  
639 can improve clonal breeding programs under the assumption of additive genetic control.  
640 We show that the two-part breeding program enables effective exploitation of genomic  
641 selection in breeding clonally propagated crops. We also explain that under additive  
642 genetic control, differences in genetic gain between the two parent selection methods  
643 mainly resulted from an increased selection intensity when parents were selected based

644 on genomic predicted cross performance compared to selection of parents based on  
645 genomic estimated breeding values. After the discussion of results when traits were  
646 under additive genetic control, we explain why genomic selection of new parents  
647 requires consideration of dominance effects unless dominance is negligible. We show  
648 that selection of parents based on genomic predicted cross performance enables  
649 efficient simultaneous exploitation of additive and dominance effects, which facilitates  
650 exploitation of pseudo-overdominance in the progeny of a cross when the dominance  
651 degree is high. We also show that multiple crossing cycles per year can have an adverse  
652 effect on long-term genetic gain, especially when the dominance degree is high. We  
653 then explain that, at higher dominance degrees, heterozygosity becomes a reliable  
654 predictor of the dominance value when parents are selected based on genomic predicted  
655 cross performance. Finally, we conclude that genomic prediction of cross performance  
656 could be an efficient method to select parents not only in clonal plant breeding  
657 programs, but also in other breeding programs for outbred individuals including animal  
658 breeding programs.

659

## 660 **Genomic selection of new parents improved genetic gain under additive** 661 **genetic control**

662 Under additive genetic control, genomic selection of new parents always  
663 produced faster genetic gain than phenotypic selection of new parents. This was  
664 observed regardless of whether parents were selected based on genomic estimated  
665 breeding values or based on genomic predicted cross performance.

666 As expected, the implementation of genomic selection improved the conversion  
667 of genetic variance into genetic gain in both variations of the two-part breeding program  
668 with one and three crossing cycles per year, respectively, and in the conventional  
669 breeding program with genomic selection. This improvement resulted from a shortened  
670 generation interval and an increased selection accuracy in early selection stages. As a  
671 consequence, the breeding programs with genomic selection also showed an  
672 accelerated depletion of genetic variance over time compared to the conventional  
673 breeding program (Fig. S1). This depletion was most severe when three crossing cycles  
674 per year were used, and it caused genetic gain to approach a plateau in the second half  
675 of the future breeding phase.

676 Our findings under additive genetic control were consistent with those of  
677 Gaynor et al. (2017) who used stochastic simulations to evaluate genomic selection  
678 strategies in plant breeding programs for developing inbred lines. We refer the reader  
679 to this study for a detailed description of the relationship between the generation  
680 interval, prediction accuracy and genetic variance when additive genetic control is  
681 assumed.

682

683 **A two-part breeding programs better exploit genomic selection than the**  
684 **conventional breeding program with genomic selection under additive genetic**  
685 **control**

686 The two-part breeding programs enabled the best possible exploitation of  
687 genomic selection under additive genetic control. They produced between 2.3 times the  
688 genetic gain of the conventional breeding program when used with parent selection

689 based genomic predicted cross performance and three crossing cycles per year, and  
690 three times the genetic gain of the conventional breeding program when used with  
691 parent selection based genomic estimated breeding values and three crossing cycles per  
692 year. The increased rates of genetic gain compared to the conventional breeding  
693 program resulted from a very short generation interval and an improved selection  
694 accuracy in the seedling stage.

695 Selection in the seedling stage poses a major challenge in clonal breeding  
696 programs due to a high selection intensity combined with low selection accuracy  
697 (Grüneberg et al., 2009; Bradshaw, 2016). The two-part breeding programs improved  
698 selection accuracy by replacing phenotypic selection with genomic selection, which  
699 enabled improvements in the selection criterion for seedlings. When phenotypic  
700 selection was used, seedlings were selected based on their observed *per se* performance.  
701 When genomic selection was used, seedlings were selected based on their predicted  
702 performance as clones because the genomic selection model was trained using data  
703 from the clonal testing stages.

704 Using genomic selection in the seedling stage improved selection accuracy for  
705 two reasons:

- 706 i) The phenotypic records in the clonal stages which were used to train the  
707 selection model had a higher heritability than the phenotypic records of  
708 the unreplicated seedlings.
- 709 ii) Marker alleles were replicated within and across years.



710 This increase of the selection accuracy also laid the foundation for the selection  
711 of new parents in the seedling stage, allowing for one or multiple cycles of crossing per  
712 year to minimize the length of the breeding cycle.

713 The conventional breeding program with genomic selection gave 1.7 times the  
714 genetic gain of the conventional breeding program when parents were selected based  
715 on genomic estimated breeding values and 1.9 times the genetic gain when parents were  
716 selected based on genomic predicted cross performance. Genomic selection was  
717 applied in clonal testing stage 1 and selection in the seedling stage was based on  
718 phenotypic *per se* performance. Hence, selection accuracy in the seedling stage was not  
719 improved compared to the conventional breeding program. The increased rate of  
720 genetic gain mainly resulted from a shortened generation interval and an improved  
721 selection accuracy in clonal testing stage 1.

722

723 **Selection of parents based on genomic predicted cross performance**  
724 **increased selection intensity compared to selection of parents based on genomic**  
725 **estimated breeding values under additive genetic control**

726 Under additive genetic control, differences in genetic gain between the two  
727 parent selection methods mainly resulted from an increased selection intensity when  
728 parents were selected based on genomic predicted cross performance compared to  
729 selection of parents based on genomic estimated breeding values.

730 When genomic estimated breeding values were used, the 30 best genotypes  
731 were selected and randomly crossed to mimic a “good by good” crossing scheme. When  
732 genomic predicted cross performance was used, parents were selected based on the

733 predicted mean genetic values of the F<sub>1</sub> of a bi-parental cross. Under additive genetic  
734 control, the predicted mean genetic value of the F<sub>1</sub> is equal to the mean genomic  
735 estimated breeding value of both parents. Selection of parents based on genomic  
736 predicted cross performance resulted in the excessive use of a few very good parents in  
737 many crosses. As a consequence, the selection intensity for parents was higher  
738 compared to when parents were selected based on genomic estimated breeding values  
739 and randomly crossed.

740 In the conventional breeding program with genomic selection, this increase in  
741 selection intensity resulted in more genetic gain over time compared to when parents  
742 were selected based on genomic estimated breeding values. In the two-part breeding  
743 programs, it resulted in more genetic gain in the first years, but thereafter genetic gain  
744 reached a plateau due to a depletion of genetic variance. This depletion of genetic  
745 variance was more severe when three crossing cycles per year were used.

746 A crossing strategy in a practical breeding program would probably lie  
747 somewhere in between the two simulated parent selection methods. A breeder would  
748 not randomly select crosses, but rather combine parents that are expected to generate  
749 improved progeny. Although very good genotypes may be used at high frequency, a  
750 breeder would make sure that an overly excessive use did not restrict the genetic  
751 variation in long-term.

752

753 **Genomic selection of new parents requires consideration of dominance**  
754 **effects unless dominance is negligible**

755           If dominance is appreciable, genetic gain becomes a function of combined  
756 additive and non-additive gene action. If epistasis is ignored, the non-additive gene  
757 action is entirely determined by dominance. Achieving a high rate of genetic gain then  
758 depends on an efficiently balanced exploitation of the additive and dominance effects  
759 (Bradshaw, 2016).

760           In particular, this requires two opposed actions:

761           i) The frequency of alleles with beneficial additive genetic effects in  
762 homozygous state has to be increased to improve the additive value in  
763 the breeding population.

764           ii) Heterozygosity has to be maintained to exploit dominance effects and keep  
765 the dominance value at a high level in the breeding population.

766           While inbreeding can be deliberately used to increase the frequency of  
767 beneficial alleles in homozygous state and hence to improve the additive value, it also  
768 results in a reduction of heterozygosity and the dominance value. In the worst case  
769 scenario, the decrease in the dominance value over time will exceed the increase in the  
770 additive value, and the rate of genetic gain will become negative due to inbreeding  
771 depression. Hence, it is obvious that both the contribution of the additive value and the  
772 contribution of the dominance value to genetic gain must be taken into account when  
773 selecting the crossing parents of the next generation.

774           More specifically, this selection process requires a balanced exploitation of the  
775 additive value and the dominance value based on the dominance degree. As the  
776 dominance degree increases, the importance of the dominance value relative to the  
777 additive value also increases, indicating that heterozygosity should be conserved more

778 effectively. Optimally, a method to select new parents would automatically balance the  
779 contribution of the additive and dominance components to sustain long-term genetic  
780 gain without any prior knowledge about the dominance degree.

781

782           **Selection of parents based on genomic predicted cross performance**  
783 **enabled an efficient simultaneous exploitation of additive effects and dominance**  
784 **effects**

785           Selection of parents based on genomic prediction of cross performance enabled  
786 an efficient simultaneous exploitation of additive effects and dominance effects by  
787 reducing the increase in inbreeding over time when the dominance degree increased.  
788 This became a crucial feature to increase genetic gain over time when the dominance  
789 degree was high.

790           As the dominance degree increased, selection of parents based on genomic  
791 prediction of cross performance produced increasingly more genetic gain than selection  
792 based on genomic estimated breeding values. By definition, the genomic estimated  
793 breeding value is the sum of the average effects of the marker alleles of a genotype.  
794 These average effects are predicted for all markers simultaneously by performing a  
795 linear regression of the phenotypes in the training population on the marker genotypes,  
796 the concept described by Falconer (1985) for a one-locus model. Although the genomic  
797 estimated breeding value thereby generally captures a large part of the dominance  
798 interaction (Falconer and Mackay, 1996; Hill et al., 2008), this population-based  
799 predictor of the value of an individual parent for the progeny generation ignores  
800 dominance deviation.

801           In contrast, selection of parents based on genomic predicted cross performance  
802 fully captures both additive and dominance marker effects. It thereby enables prediction  
803 of the expected genetic value of the progeny of a certain cross rather than prediction of  
804 the value of an individual parent. The inclusion of non-additive effects can facilitate an  
805 enhancement and an improved exploitation of non-additive genetic variation compared  
806 to parent selection based on genomic estimated breeding values (Varona et al., 2018).

807           When parents were selected based on genomic predicted cross performance, the  
808 enhancement of non-additive genetic variation was a direct outcome of the reduced  
809 increase in inbreeding over time. The improved exploitation of non-additive genetic  
810 variation resulted from the efficiently balanced exploitation of the additive and  
811 dominance value when dominance was appreciable.

812           Interestingly, the genomic prediction model for cross prediction autonomously  
813 assigned more weight to the dominance value as dominance increased without any prior  
814 knowledge about the dominance degree. This was achieved by including a covariate  
815 associated with genomic inbreeding (heterozygosity) in the model, which accounted for  
816 directional dominance, and can be seen as an estimator for inbreeding depression  
817 caused by genomic inbreeding (Xiang et al., 2016; Varona et al., 2018). As the  
818 dominance degree increased, the value of crosses which maintained heterozygosity in  
819 the population increased, and genomic prediction of cross performance accurately  
820 predicted those crosses.

821

822           **Selection of parents based on genomic predicted cross performance**  
823 **enabled exploitation of pseudo-overdominance in the progeny of a cross when the**  
824 **dominance degree was high**

825           The two-part breeding programs with parent selection based on genomic  
826 estimated breeding values gave negative genetic gain due to severe inbreeding  
827 depression when the dominance degree was high. After the first year of future breeding,  
828 the decrease in the dominance value over time was consistently higher than the increase  
829 in the additive value.

830           At first sight, this might seem surprising as we did not simulate overdominance.  
831 Under the one-locus model with a dominance degree  $< 1$ , the allelic combination with  
832 the beneficial allele in homozygous state will result in the highest genetic value of all  
833 pairwise allelic combinations. In this case, selection of parents based on the genomic  
834 estimated breeding value would be an efficient strategy to increase the frequency of the  
835 beneficial allele in the population over time, and hence to increase genetic gain. Only  
836 under overdominance does the heterozygote become superior to both homozygotes and  
837 therefore the fixation of the allele with the higher additive value would result in a  
838 reduction of the genetic value (Falconer and Mackay, 1996)

839           Overdominance seems to be an extremely rare phenomenon in nature. However,  
840 due to linkage disequilibrium (LD), haplotype blocks are the units of genetic  
841 transmission rather than single loci. When haplotype blocks with favourable alleles in  
842 repulsion phase are combined during sexual recombination, the cumulative effect of  
843 these loci can create pseudo-overdominance although the dominance degree at each  
844 locus is  $< 1$  (Bingham et al., 1994; Bingham, 1998).

845            Selection of parents based on the genomic estimated breeding value will drive  
846 an increase in the frequency of the haplotype blocks with the highest sum of average  
847 effects. The heterotic effects due to pseudo-overdominance, however, are reduced, or  
848 get lost, from one generation to the next. Furthermore, even haplotype blocks with  
849 lower genomic estimated breeding values may contain beneficial alleles, which are  
850 removed from the population through selection. As a result, genetic variance is reduced,  
851 restricting long-term additive genetic gain.

852            Selection of parents based on genomic predicted cross performance, on the other  
853 hand, included the heterotic potential of a cross when predicting the performance of the  
854 progeny. In this way, non-additive effects due to complementation of haplotype blocks  
855 can be maintained in the population over several generations when their contribution to  
856 the genetic value is high. Furthermore, by preserving haplotype blocks with lower  
857 genomic estimated breeding values for a few generations, recombination will make the  
858 beneficial alleles that they contain available for sustainable long-term genetic gain.

859

860            **Multiple crossing cycles per year using genomic prediction of cross**  
861 **performance without updating the prediction model can have an adverse effect on**  
862 **long-term genetic gain especially when the dominance degree is high**

863            In the two-part breeding programs with parent selection based on genomic  
864 predicted cross performance, genomic inbreeding increased faster with three crossing  
865 cycles per year compared to one crossing cycle per year. While using three crossing  
866 cycles per year gave more genetic gain than one crossing cycle when the dominance  
867 degree was low, it gave less genetic gain when the dominance degree was high.

868           As the dominance degree increased, maintaining a low level of inbreeding  
869 became crucial to ensure a sustainable, long-term exploitation of dominance effects.  
870 We hypothesize that two factors caused the regulation of the inbreeding coefficient to  
871 be less efficient with three crossing cycles per year compared to one crossing cycle per  
872 year:

- 873           i)       A reduced number of seedlings per crossing cycle.
- 874           ii)      An irregular updating of the prediction model for selection of new parents.

875           The increased number of crossing cycles per year in combination with a reduced  
876 number of crosses and seedlings per cross resulted in an accelerated removal of  
877 haplotype block diversity from the breeding population. To equalize annual costs, the  
878 size of the seedling population was reduced from 12,000 to 4,000 seedlings per cross  
879 with three crossing cycles per year. Hence, the population became more susceptible to  
880 genetic drift and dominance effects due to complementation of haplotype blocks could  
881 not be maintained over multiple generations.

882           The irregular updating of the prediction model for the selection of new parents  
883 resulted in a less efficiently balanced exploitation of additive and dominance effects.  
884 Although multiple cycles of crossing and selection per year effectively reduced the  
885 generation interval, the genomic prediction model was updated only once a year, and  
886 selection of new crosses became increasingly less efficient. Assuming purely additive  
887 gene action in a simulation of a line breeding program, Gaynor et al. (2017) found that  
888 the increased genetic distance between the training and prediction population caused  
889 selection accuracy to drop with every additional crossing cycle. Although we also  
890 observed a reduction in prediction accuracy with an increased number of cycles (Fig.  
891 S4), the unchanged weights assigned to additive and dominance effects by the



892 prediction model contributed more strongly to the accelerated reduction of  
893 heterozygosity. While inbreeding increased with every crossing cycle, the covariate  
894 associated with genomic inbreeding in the prediction model remained unchanged for  
895 two more cycles and could not sufficiently counteract inbreeding. When the model was  
896 then updated again in the following year, the loss of heterozygosity could not be  
897 completely reversed, which became especially problematic at a high dominance degree.

898         These results indicate that genomic prediction of cross performance to  
899 maximize genetic gain in the progeny generation might not be the best method to select  
900 new parents when multiple cycles of crossing and selection per year are used. To solve  
901 this problem, we hypothesize that a strategy such as optimal contribution selection  
902 could be useful to maximize long-term genetic gain as shown by Gorjanc et al. (2017)  
903 in a two-part line breeding program with multiple crossing cycles per year.

904

905         **Heterozygosity became a reliable predictor of the dominance value when**  
906 **the dominance degree was high**

907         Prediction accuracy of genomic predicted cross performance increased as the  
908 dominance degree increased. Furthermore, prediction accuracy of the genetic value of  
909 the seedling genotypes increased as the dominance degree increased. Both prediction  
910 criteria included a non-additive term in the prediction model to capture dominance  
911 effects.

912         We infer that marker-based heterozygosity became an accurate predictor of non-  
913 additive genetic effects for selection of new parents especially when the dominance  
914 degree was high. This was mostly driven by including the covariate associated with

915 genomic inbreeding (heterozygosity) in the model, which accounted for directional  
916 dominance. The two-part breeding programs especially benefited from the increase in  
917 prediction accuracy when the dominance degree increased.

918 Not only could cross performance be predicted more accurately, but selection  
919 accuracy in the seedlings also was significantly increased under high dominance  
920 degrees. Both factors contributed to the two-part breeding programs with genomic  
921 predicted cross performance generating the most genetic gain over time when  
922 dominance was appreciable.

923

#### 924 **Implications for other breeding programs for outbred individuals**

925 We expect genomic predicted cross performance could be used in other  
926 breeding programs for outbred individuals, such as animal breeding programs, to  
927 increase rates of genetic gain. As with clonal crops, animal breeding programs must  
928 also account for the detrimental effects of inbreeding depression. Animal breeders use  
929 various strategies to accomplish this ranging from rule-of-thumb recommendations to  
930 avoid matings between close relatives to optimal contribution selection, a numeric  
931 technique for limiting population level inbreeding (Woolliams et al., 2015). We expect  
932 genomic predicted cross performance to outperform these techniques by directly  
933 estimating progeny performance and thereby accounting for inbreeding depression in a  
934 purely data-driven manner, given the prediction model is constantly updated. However,  
935 when multiple cycles of crossing and selection per year are used without updating the  
936 prediction model, genomic prediction of cross performance to maximize genetic gain  
937 in the progeny generation might not be the best method to select new parents. In this

938 case, implementing a strategy like optimal contribution selection might be useful to  
939 maximize long-term genetic gain, outlining an important topic for further research.

940

941

942 **Acknowledgments**

943 The authors acknowledge the financial support from Innovate UK (132748).

944

945 **Conflict of interest**

946 The authors declare that they have no conflict of interest.

947

948

949

950

951

952

953

954

955

## Figures

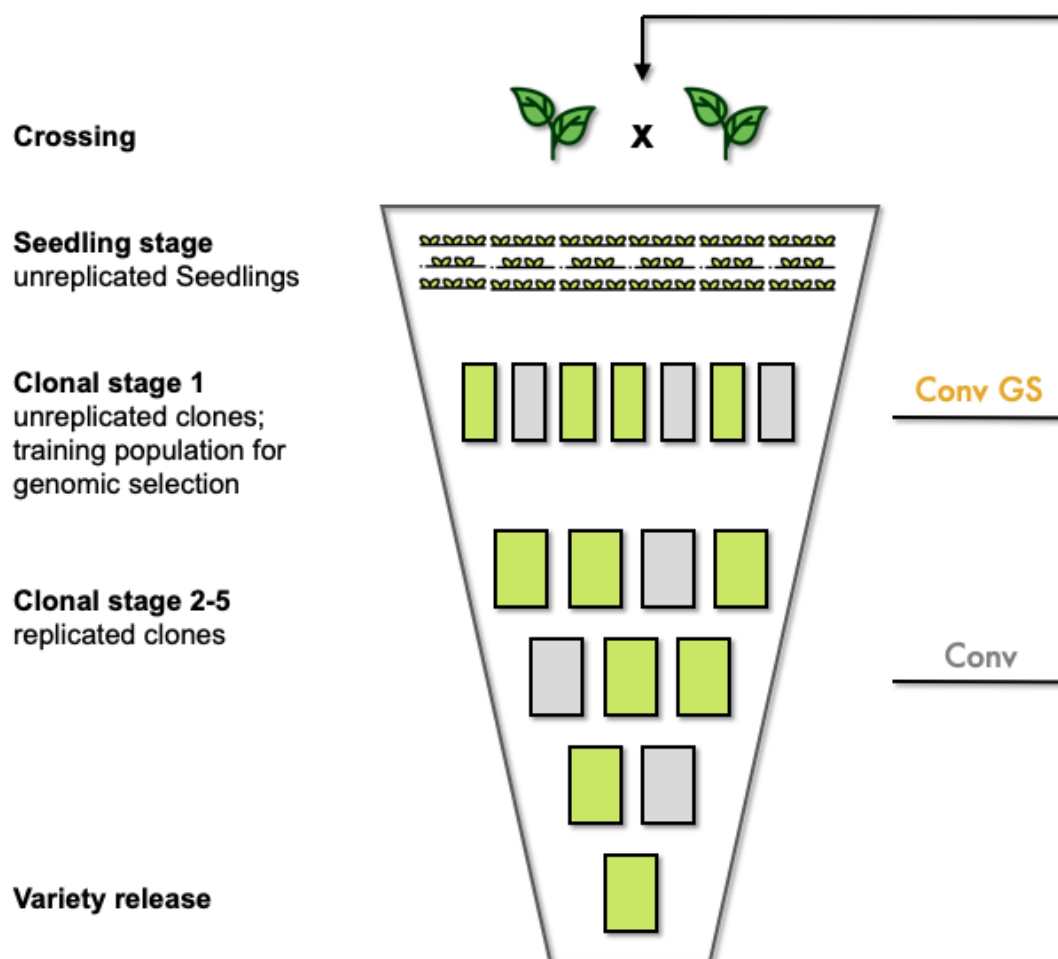

956

957 **Figure 1 Schematic overview of the conventional breeding program and**  
958 **the conventional breeding program with genomic selection.** The conventional  
959 breeding program (Conv) was used in the burn-in breeding phase and served as a  
960 control in the future breeding phase. In the conventional breeding program, parents  
961 were selected in clonal stages 2-5. The conventional breeding program with genomic  
962 selection reduced the generation interval to two years by selecting parents in clonal  
963 stage 1 based on either genomic estimated breeding values or genomic predicted cross  
964 performance. The genotypes in clonal stage 1 served as training population.

965

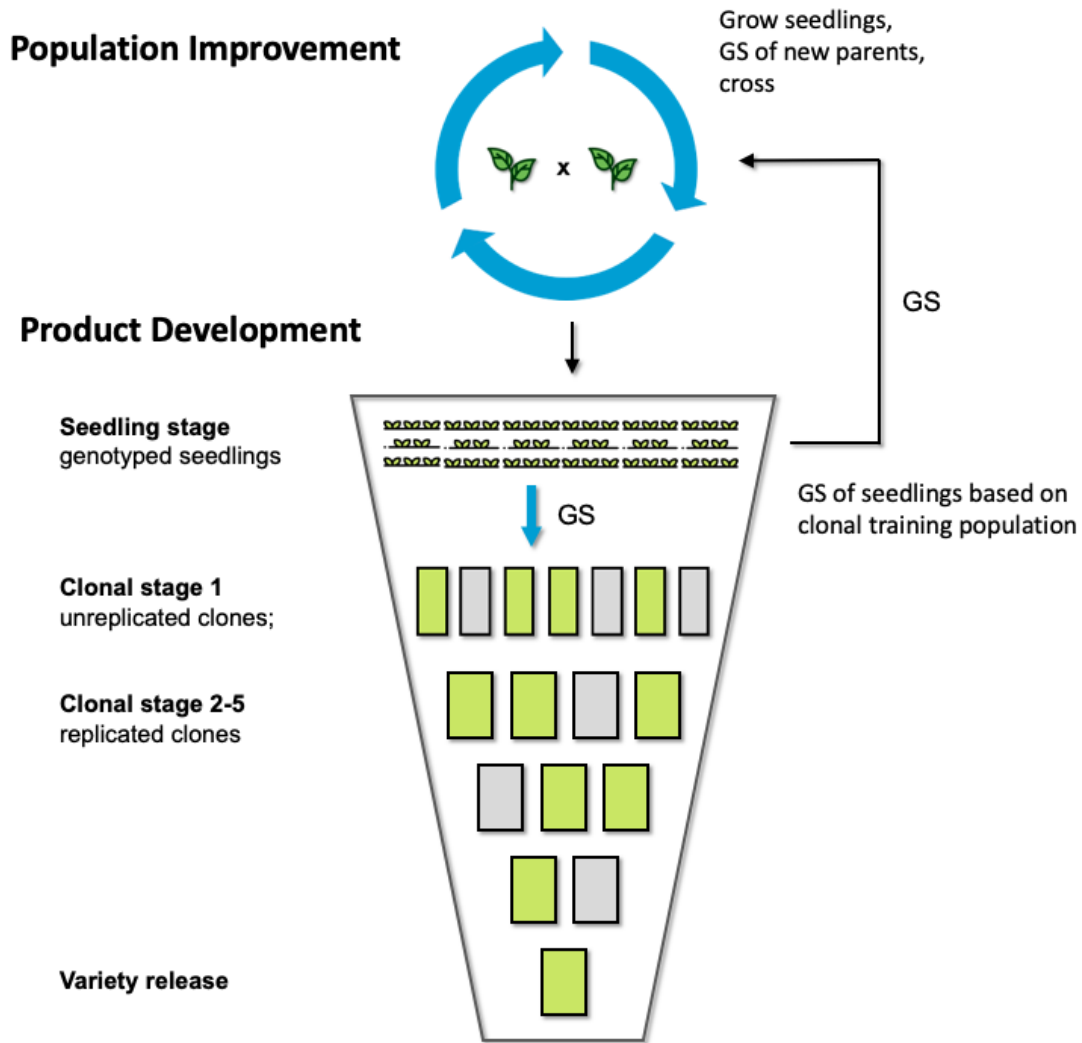

966

967 **Figure 2 Schematic overview of the two-part breeding program.** The two-  
968 part breeding program reorganized the conventional breeding program into i) a  
969 population improvement component to develop improved germplasm through rapid  
970 recurrent genomic selection; and ii) a product development component to identify the  
971 best performing genotypes. The population improvement component allows to have  
972 multiple cycles of crossing and selection per year before the seedlings are advanced to  
973 the product development component based on their genomic estimated genetic values.  
974 New parents during population improvement were selected based on either genomic  
975 estimated breeding values or genomic predicted cross performance.

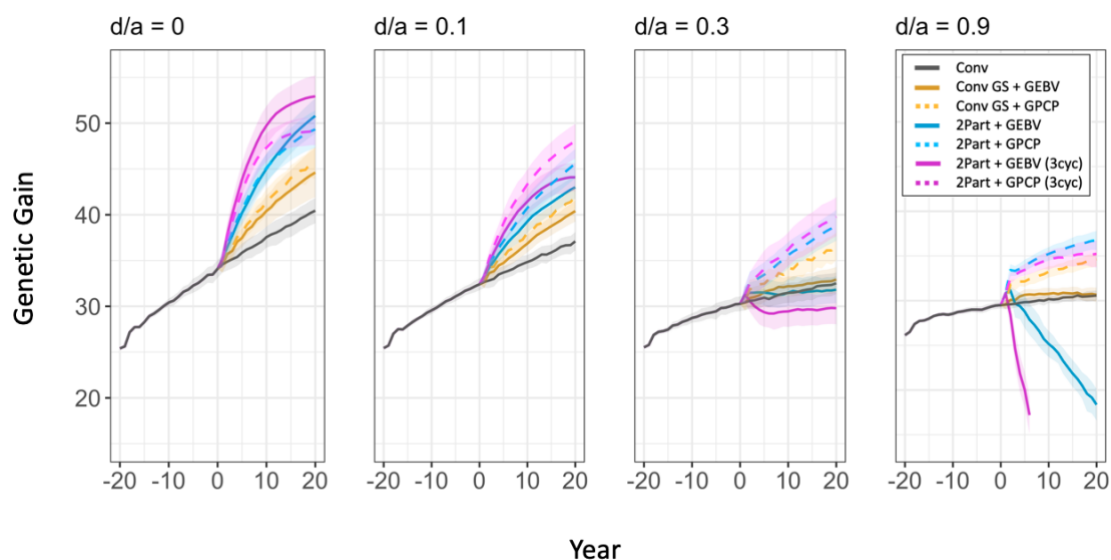

976

977 **Figure 3 Genetic gain of the simulated breeding programs under different**  
978 **dominance degrees ( $d/a$ ).** In each panel, genetic gain is plotted as mean genetic value  
979 in clonal stage 1 for the entire burn-in breeding phase and the future breeding phase.  
980 Each line shows the mean genetic value for the 10 simulated replications and the  
981 shading shows the 95% confidence intervals. The different types of breeding program  
982 are shown in different colours. The conventional breeding program (Conv) is gray. The  
983 conventional breeding program with genomic selection (Conv GS) is yellow. The two-  
984 part breeding program with genomic selection (2Part) is shown in blue with one  
985 crossing cycle per year and in purple with three crossing cycles per year. The two types  
986 of parent selection were shown in different line-styles. Selection based on Genomic  
987 Estimated Breeding Value (GEBV) is shown by continuous lines. Selection based on  
988 Genomic Prediction of Cross Performance (GPCP) is shown by dashed lines.

989

990

991

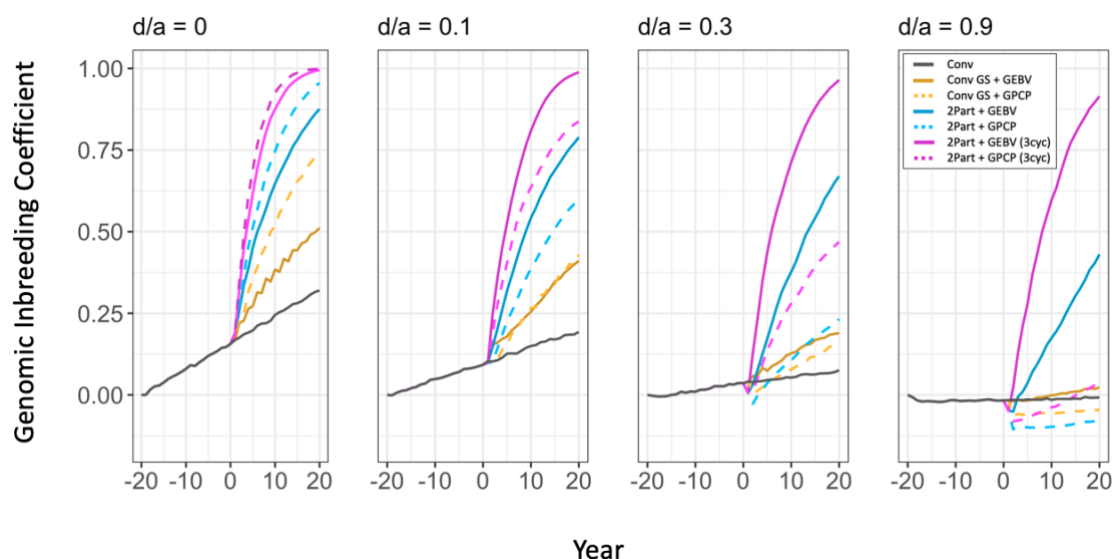

992

993 **Figure 4 Genomic inbreeding coefficient of the simulated breeding**  
994 **programs under different dominance degrees ( $d/a$ ).** In each panel, the genomic  
995 inbreeding coefficient is plotted in clonal stage 1 for the entire burn-in breeding phase  
996 and the future breeding phase. Each line shows the mean genomic inbreeding  
997 coefficient for the 10 simulated replications. The different types of breeding program  
998 are shown in different colours. The conventional breeding program (Conv) is gray. The  
999 conventional breeding program with genomic selection (Conv GS) is yellow. The two-  
1000 part breeding program with genomic selection (2Part) is shown in blue with one  
1001 crossing cycle per year and in purple with three crossing cycles per year. The two types  
1002 of parent selection were shown in different line-styles. Selection based on Genomic  
1003 Estimated Breeding Value (GEBV) is shown by continuous lines. Selection based on  
1004 Genomic Prediction of Cross Performance (GPCP) is shown by dashed lines.

1005

1006

1007

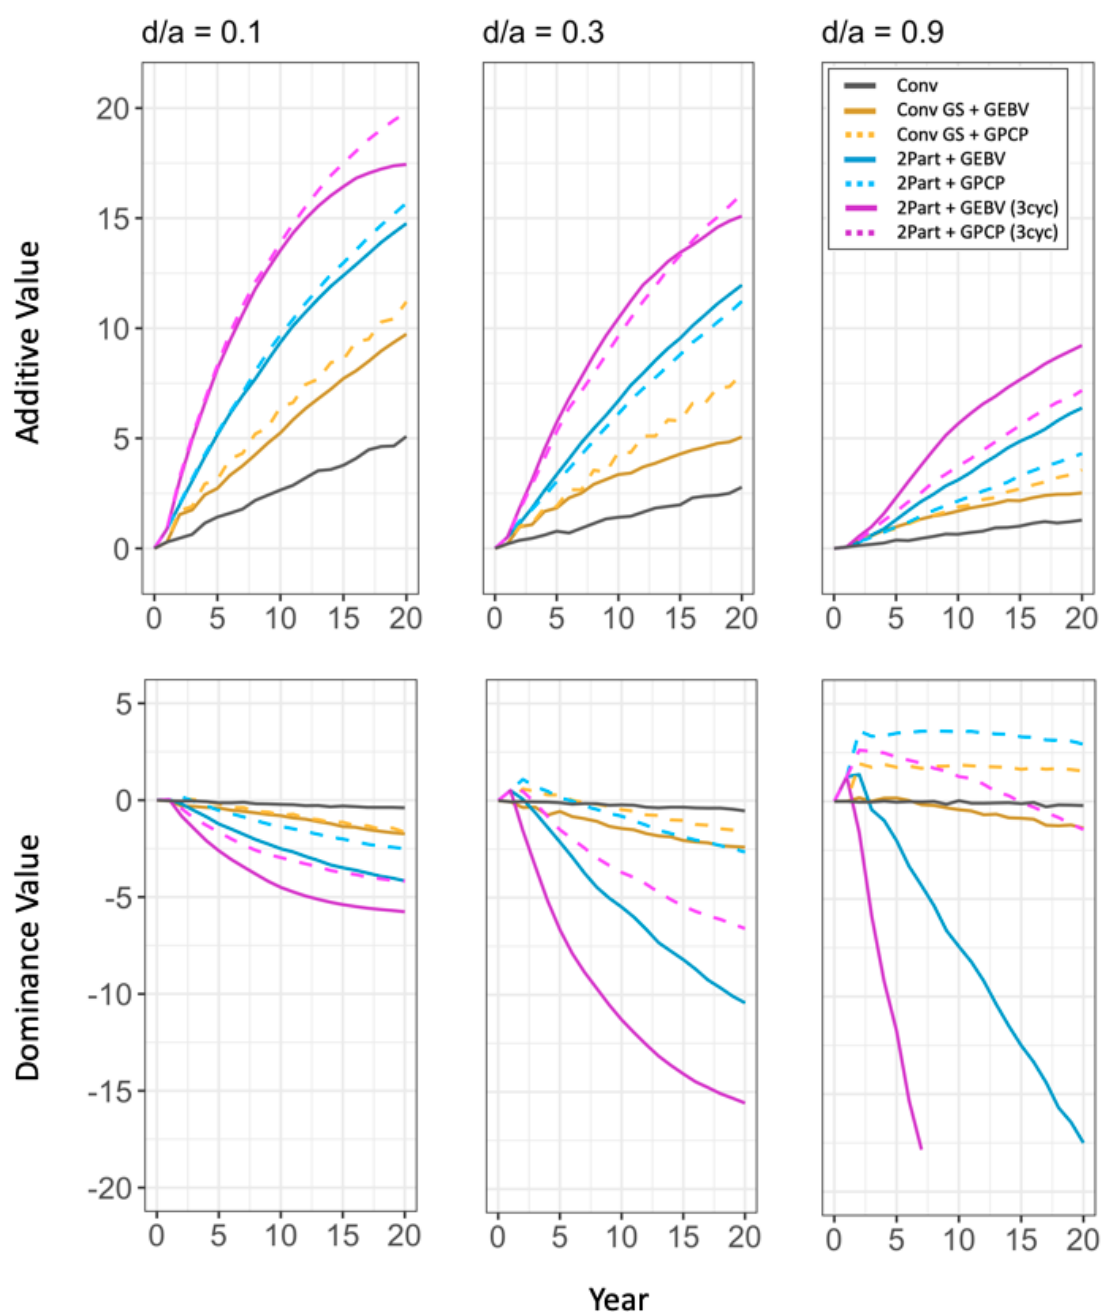

1008

1009 **Figure 5 Additive values and the dominance values of the simulated**  
 1010 **breeding programs under different dominance degrees ( $d/a$ ).** In each of the upper  
 1011 panels (a-c), the additive values are plotted in clonal stage 1 for the future breeding  
 1012 phase. The lower panels (d-f) plot the dominance values. Each line shows the mean  
 1013 value for the 10 simulated replications. The different types of breeding program are  
 1014 shown in different colours. The conventional breeding program (Conv) is gray. The  
 1015 conventional breeding program with genomic selection (Conv GS) is yellow. The two-  
 1016 part breeding program with genomic selection (2Part) is shown in blue with one



1017 crossing cycle per year and in purple with three crossing cycles per year. The two types  
1018 of parent selection were shown in different line-styles. Selection based on Genomic  
1019 Estimated Breeding Value (GEBV) is shown by continuous lines. Selection based on  
1020 Genomic Prediction of Cross Performance (GPCP) is shown by dashed lines. Additive  
1021 values and dominance values at the beginning of the future breeding phase (year 0)  
1022 were centred at zero.

1023

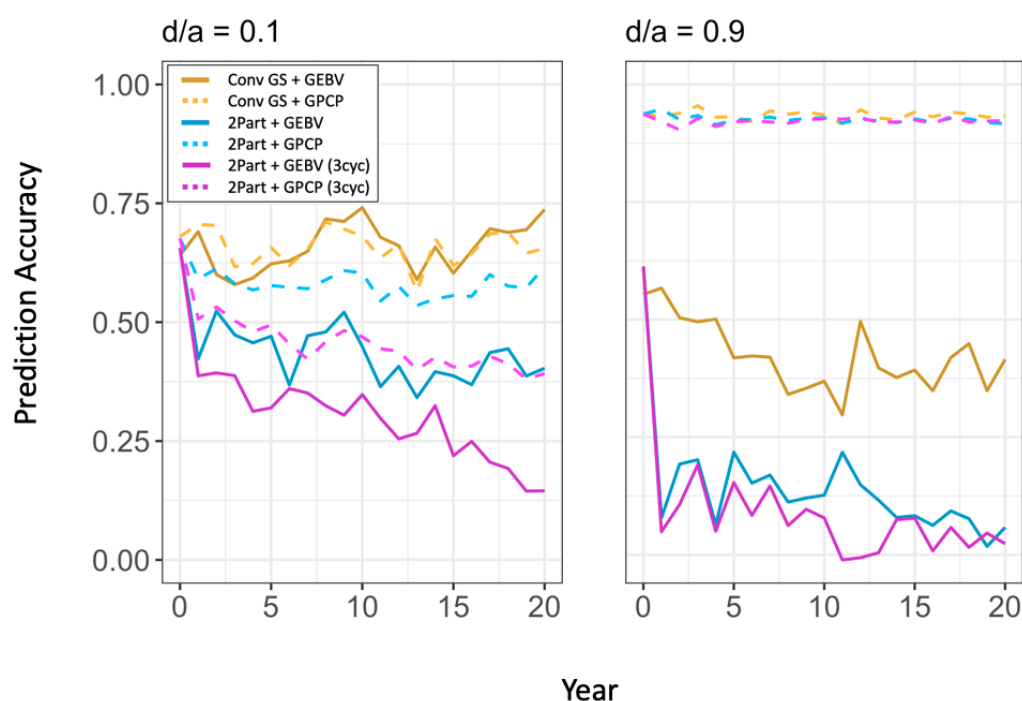

1024

1025 **Figure 6 Prediction accuracy for selection of new parents under different**  
1026 **dominance degrees (d/a).** In each panel, prediction accuracy is plotted for the future  
1027 breeding phase of the breeding programs with genomic selection. Each line shows the  
1028 mean prediction accuracy for the 10 simulated replications. The different types of  
1029 breeding program are shown in different colours. The conventional breeding program  
1030 with genomic selection (Conv GS) is yellow. The two-part breeding program with  
1031 genomic selection (2Part) is shown in blue with one crossing cycle per year and in  
1032 purple with three crossing cycles per year. The two types of parent selection were  
1033 shown in different line-styles. Selection based on Genomic Estimated Breeding Value  
1034 (GEBV) is shown by continuous lines. Selection based on Genomic Prediction of Cross  
1035 Performance (GPCP) is shown by dashed lines. Prediction accuracy was measured in

1036 the seedling stage for the two-part breeding programs and in clonal stage 1 for the  
1037 conventional breeding program with genomic selection.

1038

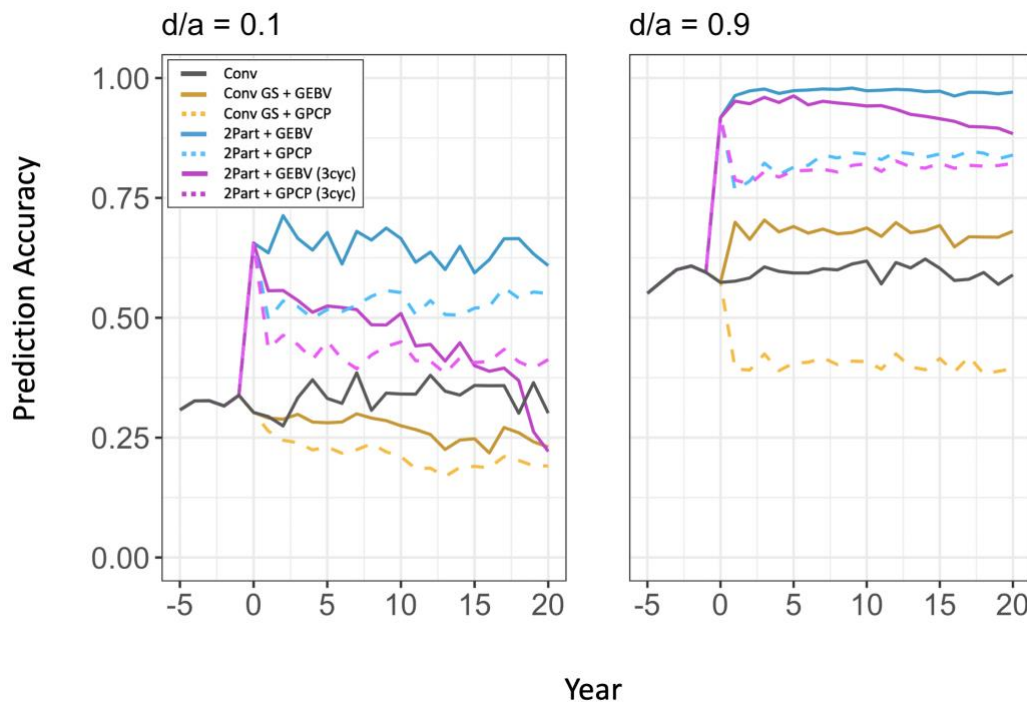

1039

1040 **Figure 7 Prediction accuracy for the total genetic value of the seedlings**  
1041 **under different dominance degrees ( $d/a$ ).** In each panel, prediction accuracy is  
1042 plotted in the seedling stage for the entire burn-in breeding phase and the future  
1043 breeding phase. Each line shows the mean prediction accuracy for the 10 simulated  
1044 replications. The different types of breeding program are shown in different colours.  
1045 The conventional breeding program (Conv) is gray. The conventional breeding  
1046 program with genomic selection (Conv GS) is yellow. The two-part breeding program  
1047 with genomic selection (2Part) is shown in blue with one crossing cycle per year and  
1048 in purple with three crossing cycles per year. The two types of parent selection were  
1049 shown in different line-styles. Selection based on Genomic Estimated Breeding Value  
1050 (GEV) is shown by continuous lines. Selection based on Genomic Prediction of Cross  
1051 Performance (GPCP) is shown by dashed lines.

1052

1053           **References**

1054    Bassil, N.V., T.M. Davis, H. Zhang, S. Ficklin, M. Mittmann, et al. 2015. Development  
1055           and preliminary evaluation of a 90 K Axiom® SNP array for the allo-octoploid  
1056           cultivated strawberry *Fragaria* × *ananassa*. *BMC Genomics* 16(1). doi:  
1057           10.1186/s12864-015-1310-1.

1058    Bingham, E.T. 1998. Role of Chromosome Blocks in Heterosis and Estimates of  
1059           Dominance and Overdominance. In: Larnkey, K.R. and Staub, J.E., editors,  
1060           CSSA Special Publications. Crop Science Society of America, Madison, WI,  
1061           USA. p. 71–87

1062    Bingham, E.T., R.W. Groose, D.R. Woodfield, and K.K. Kidwell. 1994.  
1063           Complementary Gene Interactions in Alfalfa are Greater in Autotetraploids than  
1064           Diploids. *Crop Sci.* 34(4): 823–829. doi:  
1065           10.2135/cropsci1994.0011183X003400040001x.

1066    Bisognin, D.A. 2011. Breeding vegetatively propagated horticultural crops. *Crop*  
1067           *Breed. Appl. Biotechnol.* 11(spe): 35–43. doi: 10.1590/S1984-  
1068           70332011000500006.

1069    Bradshaw, J. 2016. *Plant breeding: past, present and future*. Springer, Cham.

1070    Chen, G.K., P. Marjoram, and J.D. Wall. 2009. Fast and flexible simulation of DNA  
1071           sequence data. *Genome Res.* 19(1): 136–142. doi: 10.1101/gr.083634.108.

1072    Cossa, J., P. Pérez-Rodríguez, J. Cuevas, O. Montesinos-López, D. Jarquín, et al. 2017.  
1073           Genomic Selection in Plant Breeding: Methods, Models, and Perspectives.  
1074           *Trends Plant Sci.* 22(11): 961–975. doi: 10.1016/j.tplants.2017.08.011.

- 1075 van Dijk, T., G. Pagliarani, A. Pikunova, Y. Noordijk, H. Yilmaz-Temel, et al. 2014.  
1076 Genomic rearrangements and signatures of breeding in the allo-octoploid  
1077 strawberry as revealed through an allele dose based SSR linkage map. BMC  
1078 Plant Biol. 14(1): 55. doi: 10.1186/1471-2229-14-55.
- 1079 Falconer, D.S. 1985. A note on Fisher's 'average effect' and 'average excess.' Genet.  
1080 Res. 46(3): 337–347. doi: 10.1017/S0016672300022825.
- 1081 Falconer, D.S., and T.F.C. Mackay. 1996. Introduction to quantitative genetics. 4. ed.,  
1082 [16. print.]. Pearson, Prentice Hall, Harlow.
- 1083 Gaynor, R.C., G. Gorjanc, A.R. Bentley, E.S. Ober, P. Howell, et al. 2017. A Two-Part  
1084 Strategy for Using Genomic Selection to Develop Inbred Lines. Crop Sci. 57(5):  
1085 2372–2386. doi: 10.2135/cropsci2016.09.0742.
- 1086 Gaynor, R.C., G. Gorjanc, D. Wilson, and J.M. Hickey. 2019. AlphaSimR: Breeding  
1087 Program Simulations.
- 1088 Gemenet, D.C., and A. Khan. 2017. Opportunities and Challenges to Implementing  
1089 Genomic Selection in Clonally Propagated Crops. In: Varshney, R.K.,  
1090 Roorkiwal, M., and Sorrells, M.E., editors, Genomic Selection for Crop  
1091 Improvement. Springer International Publishing, Cham. p. 185–198
- 1092 Goddard, M. 2009. Genomic selection: prediction of accuracy and maximisation of  
1093 long term response. Genetica 136(2): 245–257. doi: 10.1007/s10709-008-9308-  
1094 0.
- 1095 Goddard, M.E., and B.J. Hayes. 2007. Genomic selection: Genomic selection. J. Anim.  
1096 Breed. Genet. 124(6): 323–330. doi: 10.1111/j.1439-0388.2007.00702.x.

- 1097 Gorjanc, G., R.C. Gaynor, and J.M. Hickey. 2017. Optimal cross selection for long-  
1098 term genetic gain in two-part programs with rapid recurrent genomic selection.  
1099 bioRxiv: 227215. doi: 10.1101/227215.
- 1100 Grüneberg, W., R. Mwanga, M. Andrade, and J. Espinoza. 2009. Selection methods.  
1101 Part 5: Breeding clonally propagated crops. *Plant Breed. Farmer Particip.*: 275–  
1102 322.
- 1103 Hill, W.G., M.E. Goddard, and P.M. Visscher. 2008. Data and Theory Point to Mainly  
1104 Additive Genetic Variance for Complex Traits. *PLOS Genet.* 4(2): e1000008.  
1105 doi: 10.1371/journal.pgen.1000008.
- 1106 Meuwissen, T., B. Hayes, and M. Goddard. 2016. Genomic selection: A paradigm shift  
1107 in animal breeding. *Anim. Front.* 6(1): 6–14. doi: 10.2527/af.2016-0002.
- 1108 Sargent, D.J., F. Fernández-Fernández, J.J. Ruiz-Roja, B.G. Sutherland, A. Passey, et  
1109 al. 2009. A genetic linkage map of the cultivated strawberry *Fragaria × ananassa*  
1110 and its comparison to the diploid *Fragaria* reference map. *Mol. Breed.* 24(3):  
1111 293–303. doi: 10.1007/s11032-009-9292-9.
- 1112 Sargent, D.J., Y. Yang, N. Šurbanovski, L. Bianco, M. Buti, et al. 2016. HaploSNP  
1113 affinities and linkage map positions illuminate subgenome composition in the  
1114 octoploid, cultivated strawberry (*Fragaria×ananassa*). *Plant Sci.* 242: 140–150.  
1115 doi: 10.1016/j.plantsci.2015.07.004.
- 1116 Su, G., O.F. Christensen, T. Ostersen, M. Henryon, and M.S. Lund. 2012. Estimating  
1117 Additive and Non-Additive Genetic Variances and Predicting Genetic Merits

- 1118 Using Genome-Wide Dense Single Nucleotide Polymorphism Markers. PLOS  
1119 ONE 7(9): e45293. doi: 10.1371/journal.pone.0045293.
- 1120 Varona, L., A. Legarra, M.A. Toro, and Z.G. Vitezica. 2018. Non-additive Effects in  
1121 Genomic Selection. Front. Genet. 9. doi: 10.3389/fgene.2018.00078.
- 1122 Woolliams, J.A., P. Berg, B.S. Dagnachew, and T.H.E. Meuwissen. 2015. Genetic  
1123 contributions and their optimization. J. Anim. Breed. Genet. 132(2): 89–99. doi:  
1124 10.1111/jbg.12148.
- 1125 Xiang, T., O.F. Christensen, Z.G. Vitezica, and A. Legarra. 2016. Genomic evaluation  
1126 by including dominance effects and inbreeding depression for purebred and  
1127 crossbred performance with an application in pigs. Genet. Sel. Evol. 48(1). doi:  
1128 10.1186/s12711-016-0271-4.
